# Supplementary material for: Lack of Association between Measles Virus Vaccine and Autism with Enteropathy: A Case-Control Study
Source: PLoS One. 2008 Sep 4;3(9):e3140. doi: 10.1371/journal.pone.0003140 (PMC2526159; doi:10.1371/journal.pone.0003140)

## Lack of association between measles virus vaccine and autism with enteropathy: a case-control study: Appendix S2

Mady Hornig1§, Thomas Briese1, Timothy Buie2, Margaret L. Bauman3, Gregory Lauwers4, Ulrike Siemetzki1, Kimberly Hummel5, Paul A. Rota5, William J. Bellini5, John J. O’Leary6, Orla Sheils6, Errol Alden7, Larry Pickering8, W. Ian Lipkin1*

August 13, 2008

**Contents Page**

**Figure S2** 2

___________

1 Center for Infection and Immunity, Mailman School of Public Health, Columbia University, New York, NY, USA

2 Division of Pediatric Gastroenterology and Nutrition, Massachusetts General Hospital, Boston, MA, USA

3 Department of Neurology, Harvard Medical School and Departments of Neurology and Pediatrics and Learning and Developmental Disabilities Evaluation and Rehabilitation Services (LADDERS), Massachusetts General Hospital, Boston, MA, USA

4 Department of Pathology of Harvard Medical School and Massachusetts General Hospital, Boston, MA, USA

5 Measles, Mumps, Rubella, and Herpesvirus Laboratory Branch, Centers for Disease Control and Prevention, Atlanta, GA, USA

6 Department of Histopathology, Trinity College Dublin, Dublin, Ireland

7 American Academy of Pediatrics, Elk Grove Village, IL, USA

8 National Center for Immunization and Respiratory Diseases, Centers for Disease Control and Prevention, Atlanta, GA, USA

* Corresponding author (email, wil2001@columbia.edu; phone +1 212 342 9033; fax +1 212 342 9044)

§ Co-corresponding author (email, mady.hornig@columbia.edu; phone +1 212 342 9036; fax +1 212 342 9044)


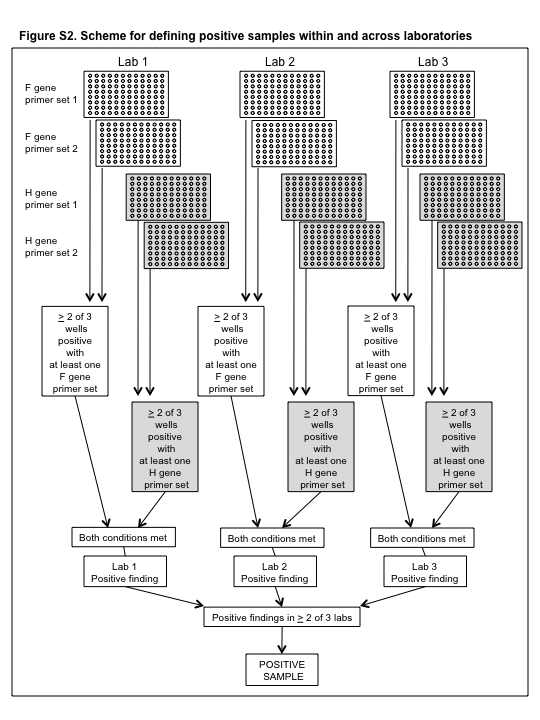

Supplement: Appendix S2 — Figure S2, study criteria and methods for resolving intra- and inter-laboratory disconcordance (0.11 MB DOC) [file pone.0003140.s002.doc]
